# Supplementary material for: The Association of Work Satisfaction and Burnout Risk in Endoscopy Nursing Staff—A Cross-Sectional Study Using Canonical Correlation Analysis
Source: Int J Environ Res Public Health. 2020 Apr 24;17(8):2964. doi: 10.3390/ijerph17082964 (PMC7215598; doi:10.3390/ijerph17082964)
Supplement: Supplementary file 1 [file ijerph-17-02964-s001.pdf]

## Supplementary Material

**Supplementary Table S1.** Factor intercorrelations between factors of the Work Satisfaction Questionnaire in the confirmatory factor analysis

|                             | colleagues | professional<br>development | payment | supervisor | general job<br>satisfaction |
|-----------------------------|------------|-----------------------------|---------|------------|-----------------------------|
| occupational<br>function    | .41        | .44                         | .13     | .33        | .53                         |
| colleagues                  |            | .38                         | .14     | .47        | .58                         |
| professional<br>development |            |                             | .33     | .45        | .63                         |
| payment                     |            |                             |         | .26        | .45                         |
| supervisor                  |            |                             |         |            | .65                         |

**Supplementary Table S2.** Standardised canonical coefficients and structure correlations of the second predictor canonical variate

| predictor canonical variate | standard canonical coefficients | structure correlations |
|-----------------------------|---------------------------------|------------------------|
| occupational function       | .72                             | .58                    |
| colleagues                  | .58                             | .41                    |
| professional development    | .28                             | .18                    |
| payment                     | -.11                            | -.26                   |
| supervisor                  | -.14                            | -.10                   |
| general job satisfaction    | -.89                            | -.28                   |

**Supplementary Table S3.** Standardized canonical coefficients and structure correlations of the second criterion canonical variate

| criterion canonical variate | standard. canonical coefficients | structure correlations |
|-----------------------------|----------------------------------|------------------------|
| emotional exhaustion        | 1.14                             | .49                    |
| personal accomplishment     | 0.64                             | .50                    |
| depersonalization           | -0.72                            | -.16                   |

**Supplementary Table S4.** Main results of commonality analysis for the second prediction canonical variate.

| predictor canonical variate                                  | coefficient | % total |
|--------------------------------------------------------------|-------------|---------|
| unique to occupational function                              | .041        | 39.4    |
| unique to general job satisfaction                           | .040        | 38.5    |
| unique to colleagues                                         | .025        | 23.7    |
| unique to personal rewards                                   |             |         |
| common to occupational function and general job satisfaction | -.0145      | -14.1   |
| common to colleagues and general job satisfaction            | -.0125      | -12.1   |
